# Supplementary material for: Fish consumption and gastric cancer within the Stomach cancer Pooling (StoP) Project
Source: Springer Nature journal article supplement (doi:10.1038/s41598-025-96658-4), 2025-04-16
Supplement: MOESM1 [file 41598_2025_96658_MOESM1_ESM.docx]

**Supplementary Materials**

**Figure S1. Flowchart of patients included in the study**

**Stomach Cancer Pooling (StoP) Consortium**

34 studies

(44,541 participants: 13,121 cases and 31,420 controls)

**Overall Analysis Sample**

25 studies

(35,334 participants: 10,431 cases and 24,903 controls)

**Final Analysis Sample**

25 studies

(33,360 participants: 9,865 cases and 23,495 controls)

**9 studies without information about fish consumption**

(9,207 participants: 2,690 cases and 6,517 controls)

**Participants with incomplete data**

(1,974 participants: 566 cases and controls 1,408)

**Table S1. Information on studies included in the analyses**

| **Study** | **Period** | **Study type**** | **Cases** |  | **Controls** |  |
| --- | --- | --- | --- | --- | --- | --- |
|  |  |  | **N** | **%** | **N** | **%** |
|  |  |  | **10,431** |  | **24,903** |  |
| ***Europe*** |  |  |  |  |  |  |
| Italy 1 | 1985-1997 | CC, HB | 769 | 7.8 | 2,081 | 8.4 |
| Italy 2 | 1997-2007 | CC, HB | 230 | 2.3 | 547 | 2.2 |
| Italy 3 | 2006-ongoing | CC, HB | 160 | 1.5 | 444 | 1.8 |
| Italy 4 | 1985-1987 | CC, PB | 1,016 | 9.7 | 1,159 | 4.6 |
| Greece | 1981-1984 | CC, HB | 110 | 1.1 | 100 | 0.4 |
| Russia | 1996-1997 | CC, HB | 450 | 4.3 | 611 | 2.4 |
| Portugal | 1999-2006 | CC, PB | 692 | 6.6 | 1,667 | 6.7 |
| Spain1 | 2008-2012 | CC, PB | 441 | 4.2 | 3,440 | 13.8 |
| Spain 2 | 1995-1999 | CC, PB | 401 | 3.8 | 455 | 1.8 |
| ***Asia*** |  |  |  |  |  |  |
| Iran 1 | 2004-2005 | CC, PB | 217 | 2.1 | 394 | 1.6 |
| Iran 2 | 2005-2007 | CC, PB | 286 | 2.7 | 304 | 1.2 |
| China 2 | 2000 | CC, PB | 206 | 2.0 | 415 | 1.7 |
| China 3 | 1991-1993 | CC, PB | 711 | 6.8 | 711 | 2.9 |
| China 4 | 1995 | CC, PB | 133 | 1.3 | 431 | 1.7 |
| Japan 3 | 1998-2002 | CC, HB | 153 | 1.5 | 303 | 1.2 |
| ***North America*** |  |  |  |  |  |  |
| Canada | 1994-1997 | CC, PB | 1,182 | 11.3 | 5,033 | 20.2 |
| USA 1 | 1992-1994 | CC, HB | 132 | 1.3 | 132 | 1.3 |
| USA 2 | 1988-1993 | CC, PB | 170 | 1.6 | 498 | 2.0 |
| USA 3 | 1995-1996 | Nested CC | 1,583 | 15.1 | 3,331 | 13.3 |
| ***Central and South America*** |  |  |  |  |  |  |
| Mexico 1 | 2004-2005 | CC, PB | 248 | 2.3 | 478 | 1.8 |
| Mexico 2 | 1989-1990 | CC, PB | 220 | 2.1 | 752 | 3.0 |
| Mexico 3 | 1994-1996 | CC, HB | 234 | 2.2 | 468 | 1.8 |
| Brazil 1 | 1991-1994 | CC, HB (Brazilian) | 226 | 2.1 | 226 | 0.8 |
| Brazil 2 | 1991-1994 | CC, HB (Japanese) | 93 | 0.9 | 186 | 0.6 |
| Brazil 3 | 2016-2020 | CC, HB | 368 | 3.4 | 737 | 2.8 |

*Information of canned fish available. ** CC case-control study; HB hospital based; PB population based.

**Table S2. Information on type of fish considered in the studies included in the analyses**

| **Study** | **Preparations** |
| --- | --- |
| ***Europe*** |  |
| Italy 1 | All types of fish (1 portion= 150 gr) |
| Italy 2 | Boiled/grilled fish/shellfish (1 portion=150 gr) – Fried fish/shellfish (1 portion =150 gr) – Canned tuna/sardines (1 portion= 80 gr) |
| Italy 3 | All types of fish (1 portion=150 gr) |
| Italy 4 | Fresh or frozen fish (1 portion=150 gr) – Canned fish (anchovies, tuna, sardines, salmon, mackerel) (1 portion=80 gr) |
| Greece | All types of fish (1 portion= 150 gr) |
| Russia | Boiled fish (1 portion=100 gr) – Fried fish (1 portion =100 gr) – salted fish (1 portion=50 gr) – Smoked fish (1 portion=50 gr) – Canned fish with oil (1 portion=50 gr) – Canned fish with tomato (1 portion= 50 gr) – Natural canned fish (1 portion=50 gr) – Shrimps, prawns, crabs (1 portion=100 gr) – Fish soup (1 portion=300 gr) |
| Portugal | Oily fish (1 portion=125 gr) – White fish (1 portion=125 gr) – Codfish (1 portion=125 gr) – Canned fish (tuna, sardines) (1 portion=120 gr) – Squid, octopus (1 portion=100 gr) – Shellfish (1 portion=100 gr) |
| Spain1 | Fresh or frozen fish or shellfish (boiled, grilled, fried, stewed) (1 portion=100 gr) |
| Spain 2 | Fried fish (1 portion=100 gr) – Boiled fish (cod, sole, sardine, tuna) (1 portion=100 gr) – Salted fish (1 portion=50 gr) – Canned fish (tuna, sardines, anchovies) (1 portion=50 gr) - Shellfish, mussels, clams, oysters (1 portion=100 gr) – Squid, octopus (1 portion= 100 gr) – Fried fish sticks (1 portion=100 gr) |
| ***Asia*** |  |
| Iran 1 | Salted fish (1 portion=50 gr) – Smoked fish (1 portion=50 gr) – Fresh fish (1 portion=100 gr) |
| Iran 2 | Processed fish (1 portion=50 gr) |
| China 2 | Smoked fish (1 portion=50 gr) – Fresh fish (1 portion=100 gr) – Salted fish (1 portion=100 gr) – Shellfish, shrimps, crabs, squid (1 portion=50 gr) |
| China 3 | Fresh fish (1 portion=100 gr) – Salted fish (1 portion=50 gr) - shrimps, crabs, squid, eel (1 portion=50 gr) |
| China 4 | All types of fish (1 portion=100 gr) |
| Japan 3 | Salted fish (1 portion=50 gr) – Dried fish (1 portion=50 gr) – Canned tuna (1 portion=50 gr) – Salmon (1 portion=100 gr) – Bonito-tuna (1 portion=100 gr) – Codfish (1 portion=100 gr) – Sea brim, horse mackerel, saury mackerel, eel, squid, octopus, shrimp, clam, fishcake tube, boiled fish paste (1 portion=50 gr) |
| ***North America*** |  |
| Canada | Fresh fish (1 portion=100 gr) – Smoked fish (1 portion=100 gr) |
| USA 1 | Fried fish (1 portion=100 gr) – Tuna (fresh, salted, canned) (1 portion=100 gr) – Shellfish (Shrimps, lobster, crabs, oysters) (1 portion=80 gr) – Other fish broiled, baked (1 portion=100 gr) |
| USA 2 | Fried fish/Fried fish sandwich (1 portion=100 gr) – Tuna,tuna salad, tuna casserole (1 portion=100 gr) – Shellfish (shrimp, crab, lobster) (1 portion=100 gr) – Other fish (1 portion=100 gr) |
| USA 3 | Fried fish or fish sticks (including fried seafood or shellfish) (1 portion=100 gr) – Other fish or seafood (not fried): flounder, cod, shrimp, clams, crabs, lobster and others) (1 portion=100 gr), Oily canned tuna (1 portion=100 gr), Natural canned tuna (1 portion=100 gr) |
| ***Central and South America*** |  |
| Mexico 1 | Fresh fish, tuna, sardines, seafood (1 portion=100 gr) |
| Mexico 2 | Fresh fish (1 portion=100 gr) |
| Mexico 3 | Fresh fish, tuna, sardines, seafood (1 portion=100 gr) |
| Brazil 1 | Freshwater or saltwater fish (1 portion=100 gr) – Salted fish (1 portion=100 gr) |
| Brazil 2 | Freshwater or saltwater fish (1 portion=100 gr) – Salted fish (1 portion=100 gr) |
| Brazil 3 | Roasted, boiled or stewed fish (1 portion=100 gr) – Fried fish (1 portion=100 gr) – Salted fish (1 portion=100 gr) |

**Table S3. Distribution of gastric cancer cases and controls according to study center, sex, age, and other selected covariates of studies reporting information on canned fish.**

| **Variables** | **Cases** |  |  | **Controls** |  |
| --- | --- | --- | --- | --- | --- |
|  | **N** | **%** |  | **N** | **%** |
| **Total** | **4,525** |  |  | **8,073** |  |
| **Study center (Reference)** |  |  |  |  |  |
| *Europe* | 2,789 | 61.7 |  | 4,439 | 55.0 |
| Italy 2 | 230 | 5.1 |  | 547 | 6.8 |
| Italy 4 | 1,016 | 22.5 |  | 1,159 | 14.4 |
| Russia | 450 | 9.9 |  | 611 | 7.6 |
| Portugal | 692 | 15.3 |  | 1,667 | 20.6 |
| Spain 2 | 401 | 8.9 |  | 455 | 5.6 |
| *Asia* |  |  |  |  |  |
| Japan 3 | 153 | 3.3 |  | 303 | 3.8 |
| *Northern America* |  |  |  |  |  |
| USA 3 | 1,583 | 35.0 |  | 3,331 | 41.2 |
| **Age at diagnosis/interview**, years, median (IQR range) | 68  60-73 |  |  | 67  58-72 |  |
| **Age groups** |  |  |  |  |  |
| <40 | 84 | 1.9 |  | 252 | 3.1 |
| 40-49 | 327 | 7.2 |  | 784 | 9.7 |
| 50-59 | 682 | 15.1 |  | 1,231 | 15.2 |
| 60-69 | 1,560 | 34.5 |  | 2,694 | 33.4 |
| 70-79 | 1,641 | 36.3 |  | 2,745 | 34.0 |
| ≥80 | 231 | 5.0 |  | 367 | 4.6 |
| **Sex** |  |  |  |  |  |
| Male | 3,040 | 67.2 |  | 5,128 | 63.5 |
| Female | 1,485 | 32.8 |  | 2,945 | 36.5 |
| **Race/Ethnic group🢭** |  |  |  |  |  |
| White | 2,386 | 52.7 |  | 4,622 | 57.2 |
| Black/African American | 88 | 1.9 |  | 96 | 1.2 |
| Asian | 38 | 0.9 |  | 51 | 0.6 |
| Hyspanic/Latinos | 52 | 1.1 |  | 83 | 1.0 |
| Other | 0 | - |  | 0 | - |
| Missing | 1,961 | 43.4 |  | 3,221 | 40.0 |
| **Social class** |  |  |  |  |  |
| Low | 2,080 | 46.0 |  | 2,562 | 31.7 |
| Intermediate | 1,639 | 36.2 |  | 3,260 | 40.4 |
| High | 703 | 15.5 |  | 2,127 | 26.3 |
| Missing | 103 | 2.3 |  | 124 | 1.6 |
| **Tumor site cases** |  |  |  |  |  |
| Cardia | 983 | 21.7 |  |  |  |
| Fundus of stomach | 110 | 2.4 |  |  |  |
| Body of stomach | 274 | 6.1 |  |  |  |
| Pyloric antrum | 427 | 9.4 |  |  |  |
| Pylorus | 53 | 1.2 |  |  |  |
| Lesser curvature of stomach | 149 | 3.3 |  |  |  |
| Greater curvature of stomach | 86 | 1.9 |  |  |  |
| Overlapping sites of stomach | 166 | 3.7 |  |  |  |
| Stomach unspecified | 610 | 13.5 |  |  |  |
| Non-cardia, unspecified | 1,619 | 35.8 |  |  |  |
| Missing | 48 | 1.0 |  |  |  |
| **Diagnosis of controls** |  |  |  |  |  |
| Traumas/sprains |  |  |  | 252 | 3.1 |
| Other orthopedic problems |  |  |  | 263 | 3.3 |
| Acute surgical condition |  |  |  | 255 | 3.2 |
| Ophthalmology |  |  |  | 54 | 0.7 |
| ORL |  |  |  | 66 | 0.8 |
| Other conditions |  |  |  | 665 | 8.2 |
| Missing |  |  |  | 6,518 | 80.7 |
| **Smoking habits** |  |  |  |  |  |
| Never smoked | 1,698 | 37.5 |  | 3,377 | 41.8 |
| Former smoker | 1,616 | 35.7 |  | 2,962 | 36.7 |
| Current smoker low | 262 | 5.8 |  | 464 | 5.7 |
| Current smoker intermediate | 398 | 8.8 |  | 516 | 6.4 |
| Current smoker high | 387 | 8.6 |  | 521 | 6.5 |
| Missing | 164 | 3.6 |  | 233 | 2.9 |
| **Alcohol, Overall consumption (gr/day)*** |  |  |  |  |  |
| Never | 978 | 21.6 |  | 1,768 | 21.9 |
| Low (≤12) | 1,096 | 24.2 |  | 2,592 | 32.1 |
| Intermediate (>12 and ≤47) | 1,680 | 37.1 |  | 2,538 | 31.4 |
| High (>47) | 697 | 15.4 |  | 967 | 12.0 |
| Missing | 74 | 1.7 |  | 208 | 2.6 |
| **History of stomach cancer in first degree relatives**† |  |  |  |  |  |
| No | 1,625 | 35.9 |  | 2,666 | 33.0 |
| Yes | 519 | 11.5 |  | 387 | 4.8 |
| Missing | 2,381 | 52.6 |  | 5,020 | 62.2 |
| **Helicobacter test**‡ |  |  |  |  |  |
| Negative | 291 | 6.4 |  | 524 | 6.5 |
| Positive | 711 | 15.7 |  | 1,555 | 19.3 |
| Uncertain | 56 | 1.2 |  | 50 | 0.6 |
| Missing | 3,467 | 76.7 |  | 5,944 | 73.6 |
| **Vegetables and fruit intake** |  |  |  |  |  |
| Low | 1,507 | 33.3 |  | 2,307 | 28.6 |
| Intermediate | 1,459 | 32.2 |  | 2,697 | 33.4 |
| High | 1,492 | 33.0 |  | 2,997 | 37.1 |
| Missing | 67 | 1.5 |  | 72 | 0.9 |
| **Energy intake, KCAL/day** |  |  |  |  |  |
| Low | 1,360 | 30.1 |  | 2,644 | 32.7 |
| Intermediate | 1,483 | 32.8 |  | 2,721 | 33.7 |
| High | 1,623 | 35.9 |  | 2,641 | 32.7 |
| Missing | 59 | 1.2 |  | 67 | 0.9 |

IQR: Interquartile Range; USA: United States of America

🢭 Variable not collected for studies: Italy 4, Japan 3

† Variable not collected for studies: USA 3

‡ Variable not collected for studies: Italy 2, Italy 4, USA 3

§ Variable not collected for studies: Italy 4

**Table S4. ORs and corresponding 95% CIs for gastric cancer according to fish and canned fish consumption (one stage analysis) in studies reporting information on Body Mass Index**

| **Frequency of fish consumption** | **Cases** |  | **Controls** |  |  | | | |  |  |
| --- | --- | --- | --- | --- | --- | --- | --- | --- | --- | --- |
|  | **N** | % | **N** | % | **OR (CI 95%)1** | **OR (CI 95%)2** | **OR (CI 95%)3** | **OR (CI 95%)4** | **OR (CI 95%)5** | **OR (CI 95%)6** |
| **Fish consumption** | 7602 |  | 17012 |  |  |  |  |  |  |  |
| **Tertiles** |  |  |  |  |  |  |  |  |  |  |
| No or Low | 2850 | 37.5 | 6319 | 37.1 | 1.00 | 1.00 | 1.00 | 1.00 | 1.00 | 1.00 |
| Intermediate | 2465 | 32.4 | 5616 | 33.0 | 0.91 (0.85-0.97) | 0.94 (0.88-1.00) | 0.93 (0.87-1.00) | 0.92 (0.85-0.98) | 0.93 (0.87-1.00) | 0.94 (0.87-1.01) |
| High | 2287 | 30.1 | 5077 | 29.9 | 0.94 (0.88-1.01) | 0.99 (0.92-1.06) | 0.98 (0.91-1.05) | 0.95 (0.88-1.02) | 0.98 (0.91-1.06) | 0.97 (0.90-1.05) |
| **Dichotomic** |  |  |  |  |  |  |  |  |  |  |
| Never or less than 1 serving/week | 3257 | 42.8 | 7156 | 42.1 | 1.00 | 1.00 | 1.00 | 1.00 | 1.00 | 1.00 |
| At least 1 servings/week | 4345 | 57.2 | 9856 | 57.9 | 0.98 (0.92-1.04) | 1.02 (0.96-1.08) | 1.01 (0.95-1.07) | 1.00 (0.94-1.06) | 1.03 (0.96-1.09) | 1.02 (0.96-1.09) |
| **Continuous** |  |  |  |  |  |  |  |  |  |  |
| 10 g/day increment |  |  |  |  | 0.99 (0.99-1.00) | 1.00 (0.99-1.00) | 1.00 (0.99-1.00) | 1.00 (0.99-1.00) | 1.00 (0.99-1.00) | 1.00 (0.99-1.00) |
| **Canned fish consumption** | 3615 |  | 6939 |  |  |  |  |  |  |  |
| **Tertiles** |  |  |  |  |  |  |  |  |  |  |
| No or Low | 1543 | 42.7 | 3057 | 44.1 | 1.00 | 1.00 | 1.00 | 1.00 | 1.00 | 1.00 |
| Intermediate | 969 | 26.8 | 1736 | 25.0 | 0.92 (0.82-1.03) | 0.95 (0.85-1.07) | 0.95 (0.85-1.07) | 0.95 (0.84-1.06) | 0.96 (0.85-1.08) | 0.96 (0.86-1.09) |
| High | 1103 | 30.5 | 2146 | 30.9 | 0.90 (0.81-0.99) | 0.92 (0.83-1.02) | 0.92 (0.83-1.02) | 0.92 (0.83-1.02) | 0.95 (0.86-1.05) | 0.95 (0.86-1.05) |
| **Dichotomic** |  |  |  |  |  |  |  |  |  |  |
| No or Low (<1 servings/week) | 2873 | 79.5 | 5202 | 75.0 | 1.00 | 1.00 | 1.00 | 1.00 | 1.00 | 1.00 |
| At least 1 servings/week | 742 | 20.5 | 1737 | 25.0 | 0.88 (0.79-0.98) | 0.90 (0.81-0.99) | 0.90 (0.81-1.00) | 0.89 (0.80-0.99) | 0.92 (0.83-1.02) | 0.92 (0.83-1.03) |
| **Continuous** |  |  |  |  |  |  |  |  |  |  |
| 10 g/day increment |  |  |  |  | 1.00 (0.99-1.01) | 1.00 (0.99-1.01) | 1.00 (0.99-1.01) | 1.00 (0.99-1.01) | 1.00 (0.99-1.01) | 1.00 (0.99-1.01) |

Included studies (studies with information on Body Mass Index (BMI) missing for less than 5% of the total sample): Italy 1, Italy 2, Italy 4, Greece, Canada, China 2, Iran 1, Iran 2, China 3, USA 1, Portugal, Japan 3, USA 2, USA 3, Brazil 3

1 adjusted for age groups and sex (Fish N=24614 Canned fish N=10554)

2adjusted for age groups, sex and social class (Fish N=24614 Canned fish N=10554)

3 adjusted for age groups, sex, social class, smoke (Fish N=24614 Canned fish N=10554)

4adjusted for age groups, sex, social class, smoke, alcohol (Fish N=22738 Canned fish N=10554) (excluded: Iran 2, China 3)

5adjusted for age groups, sex, social class, smoke, alcohol, fruit and vegetables (Fish N=22738 Canned fish N=10554) (excluded: Iran 2, China 3)

6adjusted for age groups, sex, social class, smoke, alcohol, fruit and vegetables, BMI (Fish N=22463 Canned fish N=10354) (excluded: Iran 2, China 3)

**Table S5. ORs and corresponding 95% CIs for gastric cancer according to fish and canned fish consumption (one stage analysis) in studies reporting information on Energy intake**

| **Frequency of fish consumption** | **Cases** |  | **Controls** |  |  | | | |  |  |
| --- | --- | --- | --- | --- | --- | --- | --- | --- | --- | --- |
|  | **N** | % | **N** | % | **OR (CI 95%)1** | **OR (CI 95%)2** | **OR (CI 95%)3** | **OR (CI 95%)4** | **OR (CI 95%)5** | **OR (CI 95%)6** |
| **Fish consumption** | 6228 |  | 10898 |  |  |  |  |  |  |  |
| **Tertiles** |  |  |  |  |  |  |  |  |  |  |
| No or Low | 2158 | 34.6 | 3843 | 35.3 | 1.00 | 1.00 | 1.00 | 1.00 | 1.00 | 1.00 |
| Intermediate | 1991 | 32.0 | 3508 | 32.2 | 0.95 (0.88-1.03) | 0.97 (0.89-1.05) | 0.96 (0.89-1.04) | 0.94 (0.87-1.03) | 0.97 (0.89-1.06) | 0.95 (0.87-1.04) |
| High | 2079 | 33.4 | 3547 | 32.5 | 1.05 (0.97-1.13) | 1.09 (1.01-1.18) | 1.08 (1.00-1.17) | 1.05 (0.96-1.14) | 1.10 (1.01-1.20) | 1.05 (0.96-1.14) |
| **Dichotomic** |  |  |  |  |  |  |  |  |  |  |
| Never or less than 1 serving/week | 2247 | 36.1 | 3956 | 36.3 | 1.00 | 1.00 | 1.00 | 1.00 | 1.00 | 1.00 |
| At least 1 servings/week | 3981 | 63.9 | 6942 | 63.7 | 1.06 (0.98-1.14) | 1.09 (1.01-1.17) | 1.09 (1.01-1.17) | 1.08 (1.00-1.17) | 1.13 (1.03-1.22) | 1.09 (1.00-1.19) |
| **Continuous** |  |  |  |  |  |  |  |  |  |  |
| 10 g/day increment |  |  |  |  | 1.00 (0.99-1.01) | 1.00 (1.00-1.01) | 1.00 (1.00-1.01) | 1.00 (0.99-1.01) | 1.00 (1.00-1.01) | 1.00 (0.99-1.01) |
| **Canned fish consumption** | 4459 |  | 8001 |  |  |  |  |  |  |  |
| **Tertiles** |  |  |  |  |  |  |  |  |  |  |
| No or Low | 1901 | 42.6 | 3521 | 44.0 | 1.00 | 1.00 | 1.00 | 1.00 | 1.00 | 1.00 |
| Intermediate | 1221 | 27.4 | 2075 | 25.9 | 0.91 (0.82-1.01) | 0.90 (0.80-1.01) | 0.90 (0.80-1.02) | 0.90 (0.80-1.01) | 0.91 (0.81-1.03) | 0.93 (0.83-1.03) |
| High | 1337 | 30.0 | 2405 | 30.1 | 0.94 (0.87-1.03) | 0.96 (0.88-1.05) | 0.96 (0.88-1.04) | 0.95 (0.87-1.04) | 0.98 (0.90-1.06) | 0.95 (0.87-1.05) |
| **Dichotomic** |  |  |  |  |  |  |  |  |  |  |
| No or Low (<1 servings/week) | 3483 | 78.1 | 6005 | 75.1 | 1.00 | 1.00 | 1.00 | 1.00 | 1.00 | 1.00 |
| At least 1 servings/week | 976 | 21.9 | 1996 | 24.9 | 0.94 (0.86-1.04) | 0.96 (0.88-1.06) | 0.96 (0.87-1.05) | 0.95 (0.86-1.04) | 0.97 (0.89-1.07) | 0.95 (0.87-1.05) |
| **Continuous** |  |  |  |  |  |  |  |  |  |  |
| 10 g/day increment |  |  |  |  | 1.03 (0.98-1.08) | 1.03 (0.98-1.08) | 1.03 (0.98-1.08) | 1.03 (0.98-1.08) | 1.04 (0.99-1.10) | 1.01 (0.95-1.07) |

Included studies (studies with information on energy intake missing for less than 5% of the total sample): Italy 2, Italy 4, Greece, Russia, Iran 2, China 3, Portugal, Spain 2, Mexico 1, Mexico 2, Mexico 3, Japan 3, USA 2, USA 3

1 adjusted for age groups and sex (Fish N=17126 Canned fish N=12460)

2adjusted for age groups, sex and social class (Fish N= 17126 Canned fish N=12460)

3 adjusted for age groups, sex, social class, smoke (Fish N= 17126 Canned fish N=12460)

4adjusted for age groups, sex, social class, smoke, alcohol (Fish N=15250 Canned fish N=12460) (excluded: Iran 2, China 3)

5adjusted for age groups, sex, social class, smoke, alcohol, fruit and vegetables (Fish N=14971 Canned fish N=12460) (excluded: Iran 2, China 3, Mexico 3)

6adjusted for age groups, sex, social class, smoke, alcohol, fruit and vegetables, energy intake (Fish N=14971 Canned fish N=12460) (excluded: Iran 2, China 3, Mexico 3)

**Table S6. ORs and corresponding 95% CIs for gastric cancer according to fish and canned fish consumption (one stage analysis) in studies reporting information on family history of gastric cancer**

| **Frequency of fish consumption** | **Cases** |  | **Controls** |  |  | | | | |  |  | |
| --- | --- | --- | --- | --- | --- | --- | --- | --- | --- | --- | --- | --- |
|  | **N** | % | **N** | % | **OR (CI 95%)1** | **OR (CI 95%)2** | **OR (CI 95%)3** | **OR (CI 95%)4** | **OR (CI 95%)5** | | | **OR (CI 95%)6** |
| **Fish consumption** | 3,309 |  | 8,979 |  |  |  |  |  |  | | |  |
| **Tertiles** |  |  |  |  |  |  |  |  |  | | |  |
| No or Low | 1,525 | 46.1 | 3,426 | 38.2 | 1.00 | 1.00 | 1.00 | 1.00 | 1.00 | | | 1.00 |
| Intermediate | 1,033 | 31.2 | 3,075 | 34.2 | 0.79 (0.72-0.88) | 0.76 (0.69-0.84) | 0.82 (0.73-0.93) | 0.82 (0.73-0.91) | 0.82 (0.74-0.92) | | | 0.82 (0.74-0.91) |
| High | 751 | 22.7 | 2,478 | 27.6 | 0.73 (0.65-0.81) | 0.78 (0.71-0.85) | 0.77 (0.69-0.85) | 0.76 (0.68-0.85) | 0.77 (0.69-0.87) | | | 0.78 (0.69-0.87) |
| **Dichotomic** |  |  |  |  |  |  |  |  |  | | |  |
| Never or less than 1 serving/week | 1,229 | 37.1 | 2,234 | 24.9 | 1.00 | 1.00 | 1.00 | 1.00 | 1.00 | | | 1.00 |
| At least 1 servings/week | 2,080 | 62.9 | 6,745 | 75.2 | 0.74 (0.67-0.81) | 0.76 (0.69-0.84) | 0.76 (0.69-0.84) | 0.78 (0.70-0.87) | 0.79 (0.71-0.89) | | | 0.80 (0.72-0.89) |
| **Continuous** |  |  |  |  |  |  |  |  |  | | |  |
| 10 g/day increment |  |  |  |  | 0.99 (0.98-0.99) | 0.99 (0.98-0.99) | 0.99 (0.98-0.99) | 0.99 (0.98-1.00) | 0.99 (0.98-1.00) | | | 0.99 (0.98-1.00) |
| **Canned Fish consumption** | 829 |  | 1,456 |  |  |  |  |  |  | | |  |
| **Tertiles** |  |  |  |  |  |  |  |  |  | | |  |
| No or Low | 384 | 46.3 | 642 | 44.1 | 1.00 | 1.00 | 1.00 | 1.00 | 1.00 | | | 1.00 |
| Intermediate | 224 | 27.0 | 399 | 27.4 | 1.21 (0.97-1.51) | 1.21 (0.97-1.51) | 1.21 (0.97-1.51) | 1.20 (0.96-1.50) | 1.21 (0.97-1.51) | | | 1.21 (0.97-1.52) |
| High | 221 | 26.7 | 415 | 28.5 | 0.99 (0.80-1.23) | 1.00 (0.80-1.23) | 0.99 (0.80-1.23) | 0.98 (0.79-1.21) | 0.98 (0.79-1.22) | | | 1.02 (0.82-1.26) |
| **Dichotomic** |  |  |  |  |  |  |  |  |  | | |  |
| No or Low (<1 servings/week) | 613 | 73.9 | 1,061 | 72.9 | 1.00 | 1.00 | 1.00 | 1.00 | 1.00 | | | 1.00 |
| At least 1 servings/week | 216 | 26.1 | 395 | 27.1 | 0.95 (0.78-1.16) | 0.95 (0.78-1.17) | 0.95 (0.78-1.16) | 0.94 (0.77-1.15) | 0.94 (0.77-1.15) | | | 0.97 (0.79-1.19) |
| **Continuous** |  |  |  |  |  |  |  |  |  | | |  |
| 10 g/day increment |  |  |  |  | 1.03 (0.92-1.16) | 1.03 (0.92-1.16) | 1.03 (0.92-1.16) | 1.03 (0.91-1.16) | 1.03 (0.92-1.16) | | | 1.04 (0.93-1.18) |

Included studies (studies with information on family history of gastric cancer missing for less than 5% of the total sample): Italy 1, Italy 2, Spain 1, China 2, Iran 1, Iran 2, China 4, USA 1, Brazil 1, Brazil, Japan 3, USA 2

1adjusted for age groups and sex (Fish N=12,288 Canned fish N=2,285)

2adjusted for age groups, sex and social class (Fish N=12,288 Canned fish N=2285)

3adjusted for age groups, sex, social class, smoking habits (Fish N=12,288 Canned fish N=2,285)

4adjusted for age groups, sex, social class, smoke, alcohol (Fish N=11,253, N Fish canned=2,285)

5adjusted for age groups, sex, social class, smoke, alcohol, fruit and vegetables intake (Fish N=11,253, N Fish canned=2,285)

6adjusted for age groups, sex, social class, smoke, alcohol, fruit and vegetables intake and family history of gastric cancer (N Fish=11204, N Fish canned=2253)

**Table S7. ORs and corresponding 95% CIs for gastric cancer according to fish and canned fish consumption (one stage analysis) in studies reporting information on Helicobacter Pylori test**

| **Frequency of fish consumption** | **Cases** |  | **Controls** |  |  | | | |  |  |
| --- | --- | --- | --- | --- | --- | --- | --- | --- | --- | --- |
|  | **N** | % | **N** | % | **OR (CI 95%)1** | **OR (CI 95%)2** | **OR (CI 95%)3** | **OR (CI 95%)4** | **OR (CI 95%)5** | **OR (CI 95%)6** |
| **Fish consumption** | 933 |  | 1,583 |  |  |  |  |  |  |  |
| **Tertiles** |  |  |  |  |  |  |  |  |  |  |
| No or Low | 416 | 44.6 | 616 | 38.9 | 1.00 | 1.00 | 1.00 | 1.00 | 1.00 | 1.00 |
| Intermediate | 278 | 29.8 | 499 | 31.5 | 0.85 (0.70-1.04) | 0.86 (0.71-1.05) | 0.86 (0.70-1.04) | 0.85 (0.70-1.04) | 0.81 (0.66-0.99) | 0.79 (0.65-0.97) |
| High | 239 | 25.6 | 468 | 29.6 | 0.84 (0.68-1.04) | 0.86 (0.70-1.06) | 0.85 (0.70-1.05) | 0.84 (0.68-1.04) | 0.79 (0.64-0.98) | 0.79 (0.63-0.98) |
| **Dichotomic** |  |  |  |  |  |  |  |  |  |  |
| Never or less than 1 serving/week | 443 | 47.5 | 634 | 40.0 | 1.00 | 1.00 | 1.00 | 1.00 | 1.00 | 1.00 |
| At least 1 servings/week | 490 | 52.5 | 949 | 56.0 | 0.76 (0.63-0.91) | 0.78 (0.65-0.94) | 0.77 (0.64-0.93) | 0.76 (0.63-0.92) | 0.73 (0.60-0.88) | 0.72 (0.60-0.88) |
| **Continuous** |  |  |  |  |  |  |  |  |  |  |
| 10 g/day increment |  |  |  |  | 0.99 (0.97-1.00) | 0.99 (0.97-1.00) | 0.99 (0.97-1.00) | 0.98 (0.97-1.00) | 0.98 (0.97-0.99) | 0.98 (0.97-1.00) |
| **Canned fish consumption** | 153 |  | 302 |  |  |  |  |  |  |  |
| **Tertiles** |  |  |  |  |  |  |  |  |  |  |
| No or Low | 56 | 36.6 | 101 | 33.5 | 1.00 | 1.00 | 1.00 | 1.00 | 1.00 | 1.00 |
| Intermediate | 67 | 43.8 | 133 | 44.0 | 0.90 (0.57-1.41) | 0.88 (0.56-1.38) | 0.88 (0.55-1.39) | 0.88 (0.56-1.39) | 0.88 (0.56-1.40) | 0.80 (0.49-1.30) |
| High | 30 | 19.6 | 68 | 22.5 | 0.79 (0.45-1.37) | 0.77 (0.44-1.35) | 0.84 (0.47-1.48) | 0.77 (0.44-1.35) | 0.79 (0.45-1.41) | 0.69 (0.38-1.25) |
| **Dichotomic** |  |  |  |  |  |  |  |  |  |  |
| No or Low (<1 servings/week) | 128 | 83.7 | 254 | 84.1 | 1.00 | 1.00 | 1.00 | 1.00 | 1.00 | 1.00 |
| At least 1 servings/week | 25 | 16.3 | 48 | 15.9 | 1.04 (0.61-1.78) | 1.03 (0.60-1.76) | 1.12 (0.64-1.94) | 1.05 (0.61-1.81) | 1.06 (0.61-1.85) | 0.96 (0.54-1.71) |
| **Continuous** |  |  |  |  |  |  |  |  |  |  |
| 10 g/day increment |  |  |  |  | 0.95 (0.75-1.19) | 0.94 (0.74-1.81) | 0.95 (0.76-1.21) | 0.95 (0.75-1.21) | 0.95 (0.75-1.21) | 0.91 (0.71-1.17) |

Included studies (studies with information helicobacter pylori test missing for less than 5% of the total sample): Iran 1, Japan 3, Mexico 1, Brazil 1, Brazil 2

1 adjusted for age groups and sex (Fish N=2,516 Canned fish N=455)

2adjusted for age groups, sex and social class (Fish N=2,516 Canned fish N=455)

3 adjusted for age groups, sex, social class, smoke (Fish N=2,516 Canned fish N=455)

4adjusted for age groups, sex, social class, smoke, alcohol (Fish N=2,516 Canned fish N=455)

5adjusted for age groups, sex, social class, smoke, alcohol, fruit and vegetables (Fish N=2,516 Canned fish N=455)

6adjusted for age groups, sex, social class, smoke, alcohol, fruit and vegetables, h.pylori test (Fish N=2,468 Canned fish N=452)

**Table S8. Stratified models for association between fish consumption and gastric cancer (one stage analysis)**

| **Fish consumption by strata of covariates** | **Cases** |  | **Controls** |  |  |
| --- | --- | --- | --- | --- | --- |
|  | **N** | **%** | **N** | **%** | **OR (95% CI)1** |
| **Geographic area** |  |  |  |  |  |
| **Europe** | **4,014** |  | **9,735** |  |  |
| Low | 1,504 | 37.5 | 3,530 | 36.3 | 1.00 |
| Intermediate | 1,315 | 32.8 | 3,366 | 34.6 | 0.95 (0.86-1.04) |
| High | 1,195 | 29.8 | 2,839 | 29.2 | 1.03 (0.93-1.13) |
| **Asia** | **1,606** |  | **2,416** |  |  |
| Low | 681 | 42.4 | 950 | 39.3 | 1.00 |
| Intermediate | 585 | 36.4 | 913 | 37.8 | 0.81 (0.69-0.94) |
| High | 340 | 21.2 | 553 | 22.9 | 0.75 (0.63-0.89) |
| **North America** | **3,043** |  | **8,876** |  |  |
| Low | 1,100 | 36.1 | 3,272 | 36.9 | 1.00 |
| Intermediate | 906 | 29.8 | 2,738 | 30.8 | 0.92 (0.83-1.02) |
| High | 1,037 | 34.1 | 2,866 | 32.3 | 0.98 (0.88-1.09) |
| **Central-South America** | **1,202** |  | **2,468** |  |  |
| Low | 404 | 33.6 | 921 | 37.3 | 1.00 |
| Intermediate | 334 | 27.8 | 749 | 30.3 | 1.03 (0.86-1.24) |
| High | 464 | 38.6 | 798 | 32.4 | 1.49 (1.25-1.78) |
| **Age** |  |  |  |  |  |
| **<65 years** | **4,600** |  | **12,708** |  |  |
| Low | 1715 | 37.3 | 4,787 | 37.7 | 1.00 |
| Intermediate | 1,490 | 32.4 | 4,232 | 33.3 | 0.95 (0.87-1.03) |
| High | 1,395 | 30.3 | 3,689 | 29.0 | 1.05 (0.96-1.14) |
| **≥ 65 years** | **5,265** |  | **10,787** |  |  |
| Low | 1,974 | 37.5 | 3,886 | 36.0 | 1.00 |
| Intermediate | 1,650 | 31.3 | 3,534 | 32.8 | 0.92 (0.85-1.01) |
| High | 1,641 | 31.2 | 3,367 | 31.2 | 1.01 (0.93-1.10) |
| **Sex** |  |  |  |  |  |
| **Male** | **6,510** |  | **13,633** |  |  |
| Low | 2,381 | 36.6 | 4,820 | 35.4 | 1.00 |
| Intermediate | 2,082 | 32.0 | 4,515 | 33.1 | 0.92 (0.86-1.00) |
| High | 2,047 | 31.4 | 4,298 | 31.5 | 0.97 (0.90-1.05) |
| **Female** | **3,355** |  | **9,862** |  |  |
| Low | 1,308 | 39.0 | 3,853 | 39.1 | 1.00 |
| Intermediate | 1,058 | 31.5 | 3,251 | 33.0 | 0.93 (0.84-1.03) |
| High | 989 | 29.5 | 2,758 | 27.9 | 1.11 (1.00-1.23) |
| **Social class** |  |  |  |  |  |
| **Low social class** | **4,845** |  | **8,733** |  |  |
| Low | 1,971 | 40.7 | 3,503 | 40.1 | 1.00 |
| Intermediate | 1,553 | 32.1 | 2,936 | 33.6 | 0.93 (0.85-1.01) |
| High | 1,321 | 27.2 | 2,294 | 26.3 | 1.01 (0.92-1.11) |
| **Medium social class** | **3,314** |  | **8,572** |  |  |
| Low | 1,188 | 35.8 | 3,149 | 36.7 | 1.00 |
| Intermediate | 1,064 | 32.1 | 2,818 | 32.9 | 0.96 (0.86-1.06) |
| High | 1,062 | 32.1 | 2,605 | 30.4 | 1.01 (0.91-1.12) |
| **High social class** | **1,593** |  | **6,030** |  |  |
| Low | 490 | 30.8 | 1,956 | 32.4 | 1.00 |
| Intermediate | 498 | 31.3 | 1,963 | 32.5 | 0.98 (0.84-1.13) |
| High | 605 | 37.9 | 2,111 | 35.1 | 0.99 (0.86-1.15) |
| **Smoking habits** |  |  |  |  |  |
| **Never/Ex Smoker** | **7,254** |  | **17,846** |  |  |
| Low | 2,726 | 37.6 | 6,455 | 36.2 | 1.00 |
| Intermediate | 2,319 | 32.0 | 5,941 | 33.3 | 0.92 (0.86-0.99) |
| High | 2,209 | 30.4 | 5,450 | 30.5 | 0.98 (0.91-1.06) |
| **Current smoker** | **2,328** |  | **5,255** |  |  |
| Low | 868 | 37.3 | 2,084 | 39.7 | 1.00 |
| Intermediate | 725 | 31.1 | 1,700 | 32.3 | 1.01 (0.89-1.16) |
| High | 735 | 31.6 | 1,471 | 28.0 | 1.19 (1.04-1.36) |
| **Alcohol intake** |  |  |  |  |  |
| **Never-Low alcohol intake (≤12 gr/day)** | **5,950** |  | **15,313** |  |  |
| Low | 2,304 | 38.7 | 5,890 | 38.5 | 1.00 |
| Intermediate | 1,886 | 31.7 | 5,041 | 32.9 | 0.94 (0.87-1.01) |
| High | 1,760 | 29.6 | 4,382 | 28.6 | 1.06 (0.97-1.14) |
| **Intermediate-High alcohol intake (>12 gr/day)** | **3,690** |  | **7,173** |  |  |
| Low | 1,296 | 35.1 | 2,390 | 33.3 | 1.00 |
| Intermediate | 1,177 | 31.9 | 2,404 | 33.5 | 0.93 (0.84-1.03) |
| High | 1,217 | 33.0 | 2,379 | 33.2 | 0.95 (0.86-1.05) |
| **Tumor site2** |  |  |  |  |  |
| **No Cardia** | **6,532** |  | **20,661** |  |  |
| Low | 2,454 | 37.6 | 7,606 | 36.8 | 1.00 |
| Intermediate | 2,039 | 31.2 | 6,703 | 32.4 | 0.99 (0.87-1.13) |
| High | 2,039 | 31.2 | 6,352 | 30.7 | 0.91 (0.80-1.04) |
| **Cardia** | **1,562** |  | **20,661** |  |  |
| Low | 559 | 35.8 | 7,606 | 36.8 | 1.00 |
| Intermediate | 511 | 32.7 | 6,703 | 32.4 | 0.94 (0.87-1.01) |
| High | 492 | 31.5 | 6,352 | 30.7 | 1.04 (0.96-1.11) |
| **Family history of gastric cancer**­ |  |  |  |  |  |
| **No** | **2,843** |  | **8,357** |  |  |
| Low | 1,315 | 46.2 | 3,209 | 38.4 | 1.00 |
| Intermediate | 895 | 31.5 | 2,848 | 34.1 | 0.83 (0.74-0.92) |
| High | 633 | 22.3 | 2,300 | 27.5 | 0.75 (0.67-0.84) |
| **Yes** | **447** |  | **592** |  |  |
| Low | 201 | 45.0 | 205 | 34.6 | 1.00 |
| Intermediate | 133 | 29.7 | 218 | 36.8 | 0.65 (0.48-0.88) |
| High | 113 | 25.3 | 169 | 28.6 | 0.75 (0.53-1.05) |
| **Helicobacter pylori test4** |  |  |  |  |  |
| **Negative** | **220** |  | **463** |  |  |
| Low | 99 | 45.0 | 184 | 39.7 | 1.00 |
| Intermediate | 60 | 27.3 | 143 | 30.9 | 0.73 (0.48-1.10) |
| High | 61 | 27.7 | 136 | 29.4 | 0.94 (0.61-1.45) |
| **Positive** | **678** |  | **1,091** |  |  |
| Low | 299 | 44.1 | 418 | 38.3 | 1.00 |
| Intermediate | 209 | 30.8 | 350 | 32.1 | 0.86 (0.68-1.09) |
| High | 170 | 25.1 | 323 | 29.6 | 0.84 (0.65-1.08) |
| **Energy Intake5** |  |  |  |  |  |
| **Low** | **2,002** |  | **4,554** |  |  |
| Low | 970 | 48.4 | 2,203 | 48.4 | 1.00 |
| Intermediate | 645 | 32.2 | 1,428 | 31.4 | 0.98 (0.86-1.12) |
| High | 387 | 19.4 | 923 | 20.2 | 1.01 (0.86-1.17) |
| **Medium** | 2,179 |  | 4,747 |  |  |
| Low | 736 | 33.8 | 1,511 | 31.8 | 1.00 |
| Intermediate | 744 | 34.1 | 1,710 | 36.0 | 0.87 (0.77-1.00) |
| High | 699 | 32.1 | 1,526 | 32.2 | 1.02 (0.89-1.17) |
| **High** | 2,372 |  | 4,586 |  |  |
| Low | 577 | 24.3 | 1,108 | 24.2 | 1.00 |
| Intermediate | 709 | 29.9 | 1,392 | 30.3 | 0.93 (0.81-1.08) |
| High | 1,086 | 45.8 | 2,086 | 45.5 | 1.00 (0.88-1.15) |
| **Fruit and vegetables intake**6 |  |  |  |  |  |
| **Low** | 3,067 |  | 6,600 |  |  |
| Low | 1,416 | 46.2 | 3,262 | 49.4 | 1.00 |
| Intermediate | 952 | 31.0 | 1,994 | 30.2 | 1.00 (0.90-1.13) |
| High | 699 | 22.8 | 1,344 | 20.4 | 1.15 (1.01-1.30) |
| **Medium** | 3,220 |  | 7,721 |  |  |
| Low | 1,125 | 34.9 | 2,699 | 35.0 | 1.00 |
| Intermediate | 1,098 | 34.1 | 2,756 | 35.7 | 0.97 (0.87-1.07) |
| High | 997 | 31.0 | 2,266 | 29.3 | 1.10 (0.98-1.23) |
| **High** | 3,344 |  | 8,300 |  |  |
| Low | 1,029 | 30.8 | 2,343 | 28.2 | 1.00 |
| Intermediate | 1,027 | 30.7 | 2,666 | 32.1 | 0.88 (0.79-0.99) |
| High | 1,288 | 38.5 | 3,291 | 39.6 | 0.99 (0.89-1.10) |

1Adjusted when available and applicable for sex, age groups, social class, smoke habits

2 Included studies: Italy 1, Italy 2, Italy 4, Greece, Canada, Russia, Iran 2, USA 1, Portugal, Spain 1, Spain 2, Mexico 1, Mexico 2, Brazil 1, Brazil 2, Japan, USA 2, USA 3

3 Included studies (studies with information on family history of gastric cancer missing for less than 2.5% of the total sample): Italy 1, Italy 2, Spain 1, China 2, Iran 1, Iran 2, China 4, USA 1, Brazil 1, Brazil 2, Japan 3, USA 2

4 Included studies (studies with information helicobacter pylori test missing for less than 5% of the total sample Iran 1, Japan 3, Mexico 1, Mexico 3, Brazil 1, Brazil 2

5 For energy intake study specific tertiles have been calculated. Studies included: Italy 2, Italy 4, Greece, Russia, Iran 2, China 3, Portugal, Spain 1, Spain 2, Mexico 1, Mexico 2, Mexico 3, Japan 3, USA 2, USA 3

6 Included studies: Italy 1, Italy 2, Italy 3, Italy 4, Greece, Canada, China 2, Russia, Iran 1, Iran 2, China 3, USA 1, Portugal, Spain 1, Spain 2, Mexico 1, Mexico 2, Brazil 1, Brazil 2, Japan, USA 2, USA 3, Brazil 3

**Table S9. Stratified models for association between canned fish consumption and gastric cancer (one stage analysis)**

| **Fish consumption by strata of covariates** | **Cases** |  | **Controls** |  |  |  |
| --- | --- | --- | --- | --- | --- | --- |
|  | **N** | **%** | **N** | **%** |  | **OR (95% CI)1** |
| **Geographic area** |  |  |  |  |  |  |
| **Europe** | **2,723** |  | **4,368** |  |  |  |
| Low | 988 | 36.3 | 1,645 | 37.7 |  | 1.00 |
| Intermediate | 1,136 | 41.7 | 1,902 | 43.5 |  | 0.93 (0.82-1.04) |
| High | 599 | 22.0 | 821 | 18.8 |  | 0.92 (0.79-1.06) |
| **Asia** | **153** |  | **302** |  |  |  |
| Low | 56 | 36.6 | 101 | 33.4 |  | 1.00 |
| Intermediate | 67 | 43.8 | 133 | 44.1 |  | 0.88 (0.56-1.40) |
| High | 30 | 19.6 | 68 | 22.5 |  | 0.83 (0.47-1.47) |
| **North America** | **1,583** |  | **3,331** |  |  |  |
| Low | 857 | 54.1 | 1,775 | 53.3 |  | 1.00 |
| Intermediate | 18 | 1.2 | 40 | 1.2 |  | 0.96 (0.54-1.69) |
| High | 708 | 44.7 | 1,516 | 45.5 |  | 0.97 (0.86-1.10) |
| **Central-South America** | - |  | - |  |  | - |
| Low | - |  | - |  |  | - |
| Intermediate | - |  | - |  |  | - |
| High | - |  | - |  |  | - |
| **Age** |  |  |  |  |  |  |
| **<65 years** | **1,682** |  | **3,345** |  |  |  |
| Low | 633 | 37.6 | 1,321 | 39.5 |  | 1.00 |
| Intermediate | 611 | 36.3 | 1,246 | 37.2 |  | 0.92 (0.79-1.07) |
| High | 438 | 26.1 | 778 | 23.3 |  | 0.91 (0.77-1.07) |
| **≥ 65 years** | **2,777** |  | **4,656** |  |  |  |
| Low | 1,268 | 45.7 | 2,200 | 47.3 |  | 1.00 |
| Intermediate | 610 | 22.0 | 829 | 17.8 |  | 0.96 (0.83-1.11) |
| High | 899 | 32.3 | 1,627 | 34.9 |  | 0.97 (0.87-1.08) |
| **Sex** |  |  |  |  |  |  |
| **Male** | **3,014** |  | **5,103** |  |  |  |
| Low | 1,245 | 41.3 | 2,239 | 43.9 |  | 1.00 |
| Intermediate | 789 | 26.2 | 1,161 | 22.7 |  | 0.96 (0.83-1.09) |
| High | 980 | 32.5 | 1,703 | 33.4 |  | 1.00 (0.89-1.11) |
| **Female** | **1,445** |  | **2,898** |  |  |  |
| Low | 656 | 45.4 | 1,282 | 44.2 |  | 1.00 |
| Intermediate | 432 | 29.9 | 914 | 31.5 |  | 0.85 (0.72-1.01) |
| High | 357 | 24.7 | 702 | 24.3 |  | 0.85 (0.71-1.01) |
| **Social class** |  |  |  |  |  |  |
| **Low social class** | **2,050** |  | **2,525** |  |  |  |
| Low | 725 | 35.4 | 909 | 36.0 |  | 1.00 |
| Intermediate | 879 | 42.9 | 1,072 | 42.5 |  | 0.91 (0.79-1.05) |
| High | 446 | 21.7 | 544 | 21.5 |  | 0.89 (0.75-1.06) |
| **Medium social class** | **1,638** |  | **3,260** |  |  |  |
| Low | 794 | 48.5 | 1,595 | 48.9 |  | 1.00 |
| Intermediate | 273 | 16.7 | 560 | 17.2 |  | 1.05 (0.86-1.28) |
| High | 571 | 34.8 | 1,105 | 33.9 |  | 1.00 (0.87-1.14) |
| **High social class** | **702** |  | **2,122** |  |  |  |
| Low | 343 | 48.9 | 963 | 45.4 |  | 1.00 |
| Intermediate | 69 | 9.8 | 443 | 20.9 |  | 0.95 (0.66-1.36) |
| High | 290 | 41.3 | 716 | 33.7 |  | 0.92 (0.76-1.12) |
| **Smoking habits** |  |  |  |  |  |  |
| **Never/Ex Smoker** | **3,313** |  | **6,333** |  |  |  |
| Low | 1,480 | 44.7 | 2,874 | 45.4 |  | 1.00 |
| Intermediate | 872 | 26.3 | 1,5245 | 24.1 |  | 1.00 (0.88-1.13) |
| High | 961 | 29.0 | 1,935 | 30.5 |  | 0.92 (0.83-1.03) |
| **Current smoker** | **1,045** |  | **1,499** |  |  |  |
| Low | 374 | 35.8 | 569 | 38.0 |  | 1.00 |
| Intermediate | 333 | 31.9 | 535 | 35.7 |  | 0.81 (0.65-1.00) |
| High | 338 | 32.3 | 395 | 26.3 |  | 1.09 (0.89-1.35) |
| **Alcohol intake** |  |  |  |  |  |  |
| **Never-Low alcohol intake (≤12 gr/day)** | **2,060** |  | **4,363** |  |  |  |
| Low | 1,007 | 48.9 | 2,114 | 48.4 |  | 1.00 |
| Intermediate | 383 | 18.6 | 890 | 20.4 |  | 0.85 (0.72-1.01) |
| High | 670 | 32.5 | 1,359 | 31.2 |  | 0.97 (0.86-1.10) |
| **Intermediate-High alcohol intake (>12 gr/day)** | **2,374** |  | **3,504** |  |  |  |
| Low | 879 | 37.0 | 1,332 | 38.0 |  | 1.00 |
| Intermediate | 828 | 34.9 | 1,126 | 32.1 |  | 0.94 (0.82-1.08) |
| High | 667 | 28.1 | 1,046 | 29.9 |  | 0.90 (0.78-1.03) |
| **Tumor site** |  |  |  |  |  |  |
| **No Cardia** | **3,436** |  | **8,001** |  |  |  |
| Low | 1,411 | 41.1 | 3,521 | 44.0 |  | 1.00 |
| Intermediate | 1,092 | 31.8 | 2,075 | 25.9 |  | 0.92 (0.82-1.03) |
| High | 933 | 27.1 | 2,405 | 30.1 |  | 0.91 (0.82-1.01) |
| **Cardia** | **975** |  | **8,001** |  |  |  |
| Low | 469 | 48.1 | 3,521 | 44.0 |  | 1.00 |
| Intermediate | 121 | 12.4 | 2,075 | 25.9 |  | 1.02 (0.79-1.32) |
| High | 385 | 39.5 | 2,405 | 30.1 |  | 1.07 (0.92-1.25) |
| **Family history of gastric cancer2** |  |  |  |  |  |  |
| **No** | **673** |  | **1,282** |  |  |  |
| Low | 307 | 45.6 | 564 | 44.0 |  | 1.00 |
| Intermediate | 184 | 27.3 | 346 | 27.0 |  | 1.21 (0.88-1.64) |
| High | 182 | 27.1 | 372 | 29.0 |  | 0.81 (0.57-1.16) |
| **Yes** | **141** |  | **157** |  |  |  |
| Low | 67 | 47.5 | 72 | 45.9 |  | 1.00 |
| Intermediate | 38 | 26.9 | 50 | 31.8 |  | 1.25 (0.55-2.84) |
| High | 36 | 25.6 | 35 | 22.3 |  | 1.01 (0.37-2.71) |
| **Helicobacter pylori test3** |  |  |  |  |  |  |
| **Negative** | **27** |  | **134** |  |  |  |
| Low | 11 | 40.7 | 48 | 35.8 |  | 1.00 |
| Intermediate | 10 | 37.0 | 62 | 46.3 |  | 0.75 (0.27-2.08) |
| High | 6 | 22.2 | 24 | 17.9 |  | 1.18 (0.34-4.13) |
| **Positive** | **126** |  | **165** |  |  |  |
| Low | 45 | 35.7 | 51 | 30.9 |  | 1.00 |
| Intermediate | 57 | 45.2 | 71 | 43.0 |  | 0.79 (0.46-1.38) |
| High | 24 | 19.1 | 43 | 26.1 |  | 0.62 (0.32-1.20) |
| **Energy Intake4** |  |  |  |  |  |  |
| **Low** | **1,353** |  | **2,640** |  |  |  |
| Low | 754 | 55.7 | 1,402 | 53.1 |  | 1.00 |
| Intermediate | 348 | 25.7 | 649 | 24.6 |  | 0.90 (0.75-1.09) |
| High | 251 | 18.6 | 589 | 22.3 |  | 0.82 (0.68-0.98) |
| **Medium** | **1,483** |  | **2,720** |  |  |  |
| Low | 585 | 39.5 | 1,186 | 43.6 |  | 1.00 |
| Intermediate | 434 | 29.3 | 712 | 26.2 |  | 1.07 (0.89-1.29) |
| High | 464 | 31.2 | 822 | 30.2 |  | 1.05 (0.90-1.24) |
| **High** | 1,623 |  | 2,641 |  |  |  |
| Low | 562 | 34.6 | 933 | 35.3 |  | 1.00 |
| Intermediate | 439 | 27.1 | 714 | 27.0 |  | 0.85 (0.70-1.02) |
| High | 622 | 38.3 | 994 | 37.7 |  | 0.90 (0.77-1.06) |
| **Fruit and vegetables intake** |  |  |  |  |  |  |
| **Low** | 1,507 |  | 2,307 |  |  |  |
| Low | 727 | 48.3 | 1,195 | 51.8 |  | 1.00 |
| Intermediate | 433 | 28.7 | 560 | 24.3 |  | 0.96 (0.80-1.16) |
| High | 347 | 23.0 | 552 | 23.9 |  | 0.99 (0.83-1.18) |
| **Medium** | 1,459 |  | 2,696 |  |  |  |
| Low | 569 | 39.0 | 1,154 | 42.8 |  | 1.00 |
| Intermediate | 417 | 28.6 | 716 | 26.6 |  | 1.06 (0.88-1.28) |
| High | 473 | 32.4 | 826 | 30.6 |  | 1.09 (0.93-1.29) |
| **High** | 1,493 |  |  |  |  |  |
| Low | 605 | 40.5 | 1,172 | 39.1 |  | 1.00 |
| Intermediate | 371 | 24.8 | 799 | 26.6 |  | 0.87 (0.72-1.04) |
| High | 517 | 34.7 | 1,027 | 34.3 |  | 0.88 (0.76-1.03) |

1Adjusted when available and applicable for age groups, social class, smoke

2 Included studies (studies with information on family history of gastric cancer missing for less than 5% of the total sample): Italy 2, Japan 3

3 Included studies (studies with information helicobacter pylori test missing for less than 5% of the total sample): Japan 3

4 For energy intake study specific tertiles have been calculated.

**Table S10. ORs and corresponding 95% CIs for gastric cancer according to fish consumption (one stage analysis) in studies reporting information on shellfish**

|  | **Cases** |  |  | **Controls** |  |  |  |  |  |  |
| --- | --- | --- | --- | --- | --- | --- | --- | --- | --- | --- |
|  | **N** | % |  | **N** | % |  | **OR (CI 95%)1** | **OR (CI 95%)2** | **OR (CI 95%)3** | **OR (CI 95%)4** |
| **Fish consumption** | **2917** |  |  | **7164** |  |  |  |  |  |  |
| **Tertiles** |  |  |  |  |  |  |  |  |  |  |
| No or Low | 1462 | 50.1 |  | 2800 | 39.1 |  | 1.00 | 1.00 | 1.00 | 1.00 |
| Intermediate | 805 | 27.6 |  | 2349 | 32.8 |  | 0.85 (0.76-0.95) | 0.85 (0.76-0.95) | 0.85 (0.76-0.95) | 0.86 (0.76-0.96) |
| High | 650 | 22.3 |  | 2015 | 28.1 |  | 0.92 (0.82-1.04) | 0.92 (0.81-1.04) | 0.91 (0.80-1.02) | 0.94 (0.83-1.07) |

Included studies: Italy 4, USA 1, Portugal, Spain 1, Spain 2, Mexico 1, Japan 3

1adjusted for age groups, sex and social class

2adjusted for age groups, sex, social class, smoking habits

3adjusted for age groups, sex, social class, smoking habits, alcohol intake

4adjusted for age groups, sex, social class, smoking habits, alcohol intake, fruit and vegetables intake

**Table S11. ORs and corresponding 95% CIs for gastric cancer according to fish consumption (one stage analysis) in studies reporting information on salted/smoked fish**

|  | **Cases** |  |  | **Controls** |  |  |  |  |  |  |
| --- | --- | --- | --- | --- | --- | --- | --- | --- | --- | --- |
|  | **N** | % |  | **N** | % |  | **OR (CI 95%)1** | **OR (CI 95%)2** | **OR (CI 95%)3** | **OR (CI 95%)4** |
| **Fish consumption** | **3677** |  |  | **10739** |  |  |  |  |  |  |
| **Tertiles** |  |  |  |  |  |  |  |  |  |  |
| No or Low | 1777 | 48.3 |  | 5777 | 53.8 |  | 1.00 | 1.00 | 1.00 | 1.00 |
| Intermediate | 1047 | 28.5 |  | 2782 | 25.9 |  | 1.03 (0.93-1.13) | 1.02 (0.92-1.12) | 1.01 (0.91-1.11) | 1.01 (0.91-1.12) |
| High | 853 | 23.2 |  | 2180 | 20.3 |  | 1.07 (0.96-1.20) | 1.05 (0.94-1.17) | 1.02 (0.91-1.14) | 1.02 (0.92-1.15) |

Included studies: Italy 4, Canada, Russia, Spain 1, Spain 2, Iran 1, Japan 3

1adjusted for age groups, sex and social class

1adjusted for age groups, sex and social class

2adjusted for age groups, sex, social class, smoking habits

3adjusted for age groups, sex, social class, smoking habits, alcohol intake

4adjusted for age groups, sex, social class, smoking habits, alcohol intake, fruit and vegetables intake

**Table S12. ORs and corresponding 95% CIs for gastric cancer according to fish consumption (one stage analysis) in studies reporting information on fried fish**

|  | **Cases** |  |  | **Controls** |  |  |  |  |  |  |
| --- | --- | --- | --- | --- | --- | --- | --- | --- | --- | --- |
|  | **N** | % |  | **N** | % |  | **OR (CI 95%)1** | **OR (CI 95%)2** | **OR (CI 95%)3** | **OR (CI 95%)4** |
| **Fish consumption** | **2787** |  |  | **5069** |  |  |  |  |  |  |
| **Tertiles** |  |  |  |  |  |  |  |  |  |  |
| No or Low | 1018 | 36.5 |  | 1926 | 38.0 |  | 1.00 | 1.00 | 1.00 | 1.00 |
| Intermediate | 754 | 27.1 |  | 1336 | 26.4 |  | 1.08 (0.96-1.23) | 1.07 (0.95-1.22) | 1.08 (0.95-1.22) | 1.07 (0.94-1.21) |
| High | 1015 | 36.4 |  | 1807 | 35.6 |  | 1.18 (1.05-1.34) | 1.17 (1.04-1.33) | 1.18 (1.04-1.33) | 1.18 (1.04-1.33) |

Included studies: Italy 2, Russia, USA 1, Spain 2, USA 3

1adjusted for age groups, sex and social class

2adjusted for age groups, sex, social class, smoking habits

3adjusted for age groups, sex, social class, smoking habits, alcohol intake

4adjusted for age groups, sex, social class, smoking habits, alcohol intake, fruit and vegetables intake
